# Supplementary material for: MAP1B mutations cause intellectual disability and extensive white matter deficit
Source: PubMed Central journal article supplement (PMC6110722; doi:10.1038/s41467-018-05595-6), 2018-08-27
Supplement: 41467_2018_5595_MOESM1_ESM.pdf [file 41467_2018_5595_MOESM1_ESM.pdf]

# *MAP1B* mutations cause intellectual disability and extensive white matter deficit

Walters GB et al.

## **SUPPLEMENTARY INFORMATION**

**Supplementary Table 1.** MAP1B LoF carrier status, neuropsychiatric traits and intellectual functioning.

**Supplementary Table 2.** Head circumference, height and weight comparison for MAP1B LoF carriers (n = 9) compared with controls (n = 2,200).

**Supplementary Table 3.** MAP1B coding variants previously reported in literature.

**Supplementary Table 4.** MAP1B coding variants reported in public databases.

**Supplementary Table 5.** MAP1B copy number variations reported in public databases.

**Supplementary Figure 1.** Schematic of MAP1B exons and MAP1B protein (canonical transcripts).

**Supplementary Figure 2.** Pedigree plots of MAP1B families indicating the most likely carrier of the de novo event.

**Footnote for Supplementary Figure 2.**

**Supplementary Figure 3.** Plot of mean IQ and cognitive assessment scores in MAP1B LoF carriers compared with controls.

**Footnote for Supplementary Figure 3.**

**Supplementary Figure 4.** Plot of IQ versus polygenic score for IQ (PGS-IQ) in MAP1B carriers compared with controls.

**Supplementary Figure 5.** Plot of IQ versus polygenic score for educational attainment (PGS-EDU) in MAP1B carriers compared with controls.

**Supplementary Figure 6.** Corpus callosum and brain-wide white matter volume averages.

**Supplementary Figure 7.** Greyscale images of MAP1B antibody binding on a western blot.

**Supplementary Data 1.** Effects on structural MRI brain volumes, surface areas and thickness in MAP1B LoF carriers compared with controls. Separate file.

**Supplementary References.**

## SUPPLEMENTARY TABLES

**Supplementary Table 1. *MAP1B* LoF carrier status, neuropsychiatric traits and intellectual functioning.**

| Family #-Alias (Gender) <sup>a</sup> | Variant carrier status (mode of inheritance) <sup>b</sup>              | Clinical features and functioning <sup>c</sup>                                                                                     | WASI <sup>15</sup> / WISC (III/IV) / WPPSI-R (Methods) <sup>d</sup>                  | PVNH <sup>e</sup> |
|--------------------------------------|------------------------------------------------------------------------|------------------------------------------------------------------------------------------------------------------------------------|--------------------------------------------------------------------------------------|-------------------|
| FAM1-A1 (F)                          | E712KfsTer10 ( <i>De novo</i> - paternal background)                   | Alzheimers, Education (below average)                                                                                              |                                                                                      | -                 |
| FAM1-B1 (F)                          | E712KfsTer10 (maternally inherited)                                    | ID, Hyperactive, OCD, Education (below average)                                                                                    | WASI <sup>15</sup> : FSIQ56, VIQ59, PIQ59                                            | yes               |
| FAM1-B2 (-)                          | Noncarrier                                                             |                                                                                                                                    |                                                                                      | -                 |
| FAM1-B3 (M)                          | Noncarrier                                                             | Education (average), Mild Dyslexia, ADHD symptoms                                                                                  | WASI <sup>15</sup> : FSIQ71, VIQ73, PIQ75                                            | no                |
| FAM1-C1 (F)                          | E712KfsTer10 (maternally inherited)                                    | ID, Dyslexia, Dyscalculia                                                                                                          | WASI <sup>15</sup> : FSIQ56, VIQ62, PIQ55                                            | yes               |
| FAM1-C2 (-)                          | E712KfsTer10 (maternally inherited)                                    | ID, ADD, OCD, Dyslexia                                                                                                             | WASI <sup>15</sup> : FSIQ63, VIQ61, PIQ70                                            | -                 |
| FAM1-C3 (-)                          | Noncarrier                                                             |                                                                                                                                    |                                                                                      | -                 |
| FAM1-C4 (M)                          | Noncarrier                                                             |                                                                                                                                    |                                                                                      | -                 |
| FAM1-D1 (-)                          | E712KfsTer10 (maternally inherited)                                    | ID, Dyslexia                                                                                                                       | WASI <sup>15</sup> : FSIQ66, VIQ73, PIQ63<br>WISC-III: FSIQ62, VIQ64, PIQ64          | yes               |
| FAM1-D2 (-)                          | E712KfsTer10 (maternally inherited)                                    | ID, ADHD (impulsive), NVLD, disorder of scholastic skills, behavioral and emotional disorder                                       | WASI <sup>15</sup> : FSIQ71, VIQ82, PIQ62<br>WISC-IV: FSIQ58, VC70, PR51, WM64, PS79 | yes               |
| FAM1-D3 (-)                          | E712KfsTer10 (maternally inherited)                                    | ID, Dyslexia, Dyscalculia, Epilepsy                                                                                                | WASI <sup>15</sup> : FSIQ58, VIQ62, PIQ59<br>WISC-III: FSIQ61, VIQ66, PIQ60          | yes               |
| FAM1-D4 (-)                          | Noncarrier                                                             | ID, ASD symptoms (not specified), ADD, disorder of scholastic skills (reading relatively spared), disorder of conduct and emotions | WISC-IV: FSIQ57, VC68, PR68, WM51, PS79                                              | no                |
| FAM1-D5 (-)                          | NA                                                                     |                                                                                                                                    | WPPSI-R: FSIQ72, VIQ61, PIQ89                                                        | -                 |
| FAM1-E1 (-)                          | E712KfsTer10 (maternally inherited)                                    | ID, behavioral problems and language delay                                                                                         | WPPSI-R: FSIQ66, VIQ73, PIQ65                                                        | -                 |
| FAM1-X1, X2, X3 (-)                  | Noncarrier                                                             |                                                                                                                                    |                                                                                      | -                 |
| FAM2-G1 (M)                          | Noncarrier                                                             |                                                                                                                                    |                                                                                      | no                |
| FAM2-G2 (F)                          | Noncarrier                                                             | Education (below average), Migraine                                                                                                |                                                                                      | -                 |
| FAM2-H1 (F)                          | E1032Ter ( <i>De novo</i> - paternal background)                       | Dyslexia, Dyscalculia                                                                                                              | WASI <sup>15</sup> : FSIQ77, VIQ89, PIQ67                                            | not discernable   |
| FAM2-H2 (M)                          | Noncarrier                                                             |                                                                                                                                    | WASI <sup>15</sup> : FSIQ87, VIQ86, PIQ90                                            | no                |
| FAM2-J1 (-)                          | E1032Ter (maternally inherited)                                        | ID, ASD (ICD10-F84.1), ADHD (ICD10-F90.0), disorder of motor function, NVLD, disorder of scholastic skill                          | WISC-IV: FSIQ69, VC96, PR65, WM67, PS73                                              | yes               |
| FAM2-J2 (-)                          | E1032Ter (maternally inherited)                                        | Dyslexia, Dyscalculia                                                                                                              | WASI <sup>15</sup> : FSIQ79, VIQ80, PIQ82                                            | yes               |
| FAM2-J3 (-)                          | E1032Ter (maternally inherited)                                        | ASD (ICD10-F84.1), ID, ADHD, Late talker, NVLD                                                                                     | WISC-IV: FSIQ67, VC90, PR65, WM51, PS89                                              | -                 |
| FAM2-J4 (-)                          | Noncarrier                                                             |                                                                                                                                    |                                                                                      | -                 |
| FAM2-J5 (-)                          | Noncarrier                                                             |                                                                                                                                    |                                                                                      | -                 |
| FAM2-X4, X5 (-)                      | Noncarrier                                                             |                                                                                                                                    |                                                                                      | -                 |
| FAM3-K1 (M)                          | Noncarrier                                                             |                                                                                                                                    | WASI <sup>15</sup> : FSIQ98, VIQ103, PIQ93                                           | no                |
| FAM3-K2 (F)                          | Noncarrier                                                             | Education (below average)                                                                                                          | WASI <sup>15</sup> : FSIQ103, VIQ103, PIQ101                                         | no                |
| FAM3-L1 (F)                          | R1664Ter ( <i>De novo</i> - unknown)                                   |                                                                                                                                    | WASI <sup>15</sup> : FSIQ92, VIQ105, PIQ82                                           | yes               |
| FAM3-L2 (-)                          | Noncarrier                                                             |                                                                                                                                    |                                                                                      | -                 |
| FAM3-L3 (M)                          | NA                                                                     |                                                                                                                                    |                                                                                      | -                 |
| FAM3-M1 (F)                          | R1664Ter (maternally inherited)                                        | ASD (ICD10-F84.5), disorder of scholastic skill                                                                                    | WISC-IV: FSIQ76, VC94, PR93, WM63, PS75                                              | -                 |
| FAM3-M2 (-)                          | Noncarrier                                                             |                                                                                                                                    |                                                                                      | -                 |
| FAM4 (M)                             | 5q11.2-13.2 deletion (14.7 MB) ( <i>De novo</i> - paternal background) | ID (severe)                                                                                                                        |                                                                                      | -                 |

<sup>a</sup>FAM refers to family, F for female, M for male and – for gender not reported here.

<sup>b</sup>GenBank: NP\_005900[<https://www.ncbi.nlm.nih.gov/protein/153945728>] (GenBank:

NM\_005909[[https://www.ncbi.nlm.nih.gov/nucore/NM\\_005909.4](https://www.ncbi.nlm.nih.gov/nucore/NM_005909.4)], hg38): E712KfsTer10 (c.2133delG, chr5:72195488 (G/-)), E1032Ter (c.3094G>T, chr5:72196449 (G/T)), R1664Ter (c.4990C>T, chr5:72198345 (C/T)).

<sup>c</sup>Education is year of birth and gender adjusted number of years in education system (average is defined as  $\pm 0.5$  SD). ADD, Attention deficit disorder; ADHD, Attention deficit/Hyperactivity disorder; ASD, Autism spectrum disorder; ID, Intellectual disability; NVLD, Nonverbal learning disorder; OCD, Obsessive compulsive disorder.

<sup>d</sup>WASI<sup>15</sup> - Wechsler Abbreviated Scale of Intelligence (Icelandic version)<sup>1,2</sup>, WPPSI-R - Wechsler Preschool and Primary Scale of Intelligence<sup>3</sup>, WISC - Wechsler Intelligence Scale for Children (III and IV)<sup>4,5</sup>, IQ - Intelligence Quotient, VIQ - Verbal IQ, PIQ - Performance IQ, FSIQ - Full Scale IQ, VC - Verbal Comprehension, PR - Perceptual Reasoning, WM - Working Memory, PS - Processing Speed.

<sup>e</sup>PVNH - Periventricular nodular heterotopia, clinical magnetic resonance imaging (MRI) evaluation.

**Supplementary Table 2. Head circumference, height and weight for *MAP1B* LoF carriers (n = 9) compared with controls (n = 2,200).**

| Trait                   | <i>MAP1B</i> mean (SD) | Control mean (SD) | $\beta$ | <i>P</i> |
|-------------------------|------------------------|-------------------|---------|----------|
| Head circumference (cm) | 55.5 (1.3)             | 57.4 (2.3)        | -0.62   | 0.16     |
| Height (m)              | 1.7 (0.2)              | 1.7 (0.1)         | -0.011  | 0.98     |
| Weight (kg)             | 86.8 (17.8)            | 82.9 (21.4)       | 0.26    | 0.56     |

The mean (SD) values are unadjusted measurements of head circumference (in centimeters), height (in meters) and weight (in kilograms). For analyses the measurements were inverse normal transformed followed by adjusted for sex, age and age<sup>2</sup>. Values were then shifted and scaled, resulting in controls having a mean of 0 and a standard deviation of 1. The effects ( $\beta$  in SD) and *P-values* were calculated by comparing *MAP1B* LoF carriers with controls using a generalised least squares regression with a variance-covariance matrix based on the kinship coefficient of each pair of individuals. The  $\beta$  represents the effect of the *MAP1B* LoF carrier status on the three traits.

Dysmorphic features, based on Tripi et al.<sup>6</sup> were also evaluated by the interviewing psychologist, including head shape/cephalic index, prominent forehead, micrognathia, inner-canthal distance (hyper-hypotelorism), fused eyebrows, epicanthus, ptosis, low set ears or ear anomalies, philtrum length, thin upper lip, cleft lip or palate (uvula), finger length, and finger or nail anomalies. None of the features were in excess in the *MAP1B* LoF carriers.

### Supplementary Table 3. *MAP1B* coding variants previously reported in literature.

| Literature Source                           | hg38     | hg19     | Alleles | Protein      | Comment                                                                                                                 |
|---------------------------------------------|----------|----------|---------|--------------|-------------------------------------------------------------------------------------------------------------------------|
| Iossifov et al. 2012, Ref. <sup>7</sup>     | 72195128 | 71490955 | C/A     | D591E        | de novo missense in a female with ASD (quadid 12220)                                                                    |
| Iossifov et al. 2014, Ref. <sup>8</sup>     | 72199099 | 71494926 | C/T     | S1915F       | missense transmitted from father to unaffected daughter who is a sibling of an individual with ASD (family id 14637)    |
| De Rubeis et al. 2014, Ref. <sup>9</sup>    | 72195267 | 71491094 | G/T     | V638L        | missense in a female with ASD (Autism Sequencing Consortium-ASC, Child_ID:09C81948)                                     |
| Krumm et al. 2015, Ref. <sup>10</sup>       | 72107534 | 71403361 | G/A     | M1I          | start lost missense transmitted from father to son with Asperger (family id 13383)                                      |
| Krumm et al. 2015, Ref. <sup>10</sup>       | 72107534 | 71403361 | G/A     | M1I          | start lost missense transmitted from father to unaffected son who is a sibling of a male with Autism (family id 13534)  |
| Krumm et al. 2015, Ref. <sup>10</sup>       | 72194265 | 71490092 | G/A     | V304M        | missense transmitted from father to unaffected son who is a sibling of a male with Autism (family id 13984)             |
| Krumm et al. 2015, Ref. <sup>10</sup>       | 72194265 | 71490092 | G/A     | V304M        | missense transmitted from mother to son with PDD and unaffected daughter (family id 14664)                              |
| Krumm et al. 2015, Ref. <sup>10</sup>       | 72197922 | 71493749 | G/A     | E1523K       | missense transmitted from father to son with PDD (family id 12802)                                                      |
| Krumm et al. 2015, Ref. <sup>10</sup>       | 72197922 | 71493749 | G/A     | E1523K       | missense transmitted from mother to son with Autism and unaffected daughter (family id 12833)                           |
| Krumm et al. 2015, Ref. <sup>10</sup>       | 72205237 | 71501064 | T/A     | Ter2469K     | Stop lost missense transmitted from mother to unaffected son who is a sibling of a female with Autism (family id 13335) |
| DDD (McRae et al.) 2017, Ref. <sup>11</sup> | 72195326 | 71491153 | G/-     | K657KfsTer23 | de novo frameshift LoF in a male with DD (DDD4K.01352)                                                                  |
| DDD (McRae et al.) 2017, Ref. <sup>11</sup> | 72200116 | 71495943 | C/T     | S2254L       | missense in a male with DD (DDD4K.01526)                                                                                |
| Kosmicki et al. 2017, Ref. <sup>12</sup>    | 72194697 | 71490524 | A/T     | K448Ter      | stop gain in a male control (nn.4402-53)                                                                                |
| Simons Simplex Collection <sup>a</sup>      | 72107559 | 71403386 | G/T     | E10Ter       | stop gain in father of a male with ASD (TO2_FB12121FA)                                                                  |
| Simons Simplex Collection <sup>a</sup>      | 72199287 | 71495114 | G/T     | E1978Ter     | stop gain in mother of a female with ASD (TO2_14444MO)                                                                  |

<sup>a</sup>Simons Simplex Collection (SSC) data was accessed through the WuXi NextCODE-SSC portal [<https://simons.wuxinextcode.com/csa/projects/10025/dashboard>]. We are grateful to all of the families at the participating SSC sites, as well as the principal investigators (A. Beaudet, R. Bernier, J. Constantino, E. Cook, E. Fombonne, D. Geschwind, R. Goin-Kochel, E. Hanson, D. Grice, A. Klin, D. Ledbetter, C. Lord, C. Martin, D. Martin, R. Maxim, J. Miles, O. Ousley, K. Pelphrey, B. Peterson, J. Piggot, C. Saulnier, M. State, W. Stone, J. Sutcliffe, C. Walsh, Z. Warren, E. Wijsman). We appreciate obtaining access to phenotypic and genotypic data on SFARI Base via the WuXi NextCODE-SSC portal. Approved researchers can obtain the SSC population dataset referred to in the above table by applying at <https://base.sfari.org/>, as well as access to the WuXi NextCODE-SSC portal, which hosts the data in a cloud environment with integrated analytical tools.

The following query string was used to identify the two variants, in the Simons Simplex Collection (SSC) data through the WuXi NextCODE-SSC portal:

```
def ##ref## = ref;
def ##vep_single## = source/anno/vep_v85/vep_single_wgs.gord;
def ##freqmax## = ##ref##/freq_max.gorz | select 1-4,max_af;
def ##VEPfreq## = ##vep_single## | where max_consequence in
('transcript_ablation','splice_acceptor_variant','splice_donor_variant','stop_gained','frameshift_variant','stop_lost','start_lost','transcript_amplification') | varjoin -r -l -e 0.0 <(gor ##freqmax##);
gor #genes# | where gene_symbol in ('MAP1B') | join -segvar <(gor ##VEPfreq##) -xr gene_symbol -xl gene_symbol | where max_consequence in
('transcript_ablation','splice_acceptor_variant','splice_donor_variant','stop_gained','frameshift_variant','stop_lost','start_lost','transcript_amplification') | where isfloat(max_Af) and float(max_Af) <= 0.05 | select
1,Pos- | rename Gene_symbolx Gene_Symbol | sort 3000000 | varjoin -r <(gor #wgsvars# -f 'TO2_14692FA',...ALL_SUBJECT_IDS,...,TO2_11025FA') | where Depth = 9999 or GL_Call >= 5 and Depth >= 8 and
(CallCopies = 2 and CallRatio >= 0.66 or CallCopies = 1 and CallRatio >= 0.2 and CallRatio <= 1.0-0.2) |group 1 -gc
Reference,Call,Max_Impact,max_consequence,Biotype,Gene_Symbol,Transcript_count,Amino_Acids,Protein_Position,CDS_position,Refgene,MAX_AF -count -sc PN -lis -len 20000 |rename allCount PN_count
```

**Supplementary Table 4. *MAP1B* coding variants reported in public databases.**

| Database Source <sup>a</sup> | hg38     | hg19     | Alleles         | Protein        | rs-ID       | ExAc/gnomAD allele frequency <sup>b</sup> | Carriers <sup>c</sup>                                                  |
|------------------------------|----------|----------|-----------------|----------------|-------------|-------------------------------------------|------------------------------------------------------------------------|
| gnomAD                       | 72115745 | 71411572 | G/T             | E78Ter         |             | - / 0.0000323                             | one African                                                            |
| ExAc/gnomAD                  | 72186641 | 71482468 | C/T             | R133Ter        | rs773674867 | 0.000008237 / 0.000004062                 | one European (Non-Finnish)                                             |
| ExAc/gnomAD                  | 72186650 | 71482477 | -/T             | L137AfsTer9    | rs753828375 | 0.000008237 / 0.000004061                 | one European (Non-Finnish)                                             |
| ExAc/gnomAD/EVS-ESP          | 72194250 | 71490077 | C/T             | R299Ter        | rs146324682 | - / 0.00003229                            | one European (Non-Finnish)                                             |
| ExAc/gnomAD                  | 72194697 | 71490524 | A/T             | K448Ter        | rs770530337 | 0.000008242 / 0.000004062                 | one European (Non-Finnish)                                             |
| dbSNP                        | 72194811 | 71490638 | C/T             | R486Ter        | rs868169901 |                                           | Not available                                                          |
| ExAc                         | 72194889 | 71490716 | A/-             | K512SfsTer19   | rs760995541 | 0.000008353 / -                           | one European (Non-Finnish)                                             |
| dbSNP                        | 72194908 | 71490735 | A/-             | Q518QfsTer12   | rs36100729  |                                           | Not available                                                          |
| ExAc                         | 72195092 | 71490919 | GTTGAAAGCAAAG/- | V580KfsTer3    |             | 0.000008307 / -                           | one East Asian                                                         |
| ExAc                         | 72195101 | 71490928 | C/-             | S582RfsTer5    | rs765350019 | 0.00002497 / -                            | two African                                                            |
| EVS-ESP                      | 72195224 | 71491051 | GC/-            | Q624SfsTer23   |             |                                           | two European American                                                  |
| DECIPHER                     | 72195326 | 71491153 | G/-             | K657KfsTer23   |             |                                           | one heterozygous with multiple abnormalities                           |
| EVS-ESP                      | 72195391 | 71491218 | -/C             | E679DfsTer23   | rs896243481 |                                           | ten European American and 20 African American                          |
| dbSNP                        | 72195405 | 71491232 | G/-             | V684SfsTer37   | rs867533822 |                                           | Not available                                                          |
| EVS-ESP                      | 72195414 | 71491241 | -/CCTGA         | E687AfsTer2    | rs903414821 |                                           | 12 European American and 23 African American (plus one homozygous AA)  |
| EVS-ESP                      | 72195418 | 71491245 | T/-             | I688TfsTer34   |             |                                           | ten European American and 24 African American (plus one homozygous AA) |
| gnomAD                       | 72195507 | 71491334 | A/T             | K718Ter        |             | - / 0.000004616                           | one Latino                                                             |
| ExAc/1000Genomes             | 72197175 | 71493002 | G/T             | E1274Ter       | rs186784968 | 0.000008241 / -                           | one European (Non-Finnish)                                             |
| ExAc                         | 72199249 | 71495076 | -/C             | E1968RfsTer8   | rs775893760 | 0.00002493 / -                            | three European (Non-Finnish)                                           |
| ExAc/gnomAD/1000Genomes      | 72199526 | 71495353 | T/G             | Y2057Ter       | rs548994956 | 0.000008247 / 0.00002031                  | four Latino and one Other                                              |
| gnomAD                       | 72199714 | 71495541 | A/-             | K2121SfsTer115 |             | - / 0.000004063                           | one South Asian                                                        |

<sup>a</sup>1000Genomes = 1000 Genomes Project (<http://www.1000genomes.org/>); dbSNP = Database of single nucleotide polymorphisms ([https://www.ncbi.nlm.nih.gov/projects/SNP/snp\\_ref.cgi?genelid=4131](https://www.ncbi.nlm.nih.gov/projects/SNP/snp_ref.cgi?genelid=4131)); DECIPHER = Databases of genomic variation and Phenotype in Humans using Ensembl Resources v9.19 (<https://decipher.sanger.ac.uk/>); EVS-ESP = Exome Sequencing Project-Exome Variant Server (<http://evs.gs.washington.edu/EVS/>); ExAc = Exome Aggregation Consortium (<http://exac.broadinstitute.org/gene/ENSG00000131711>); gnomAD = Genome Aggregation Database (<http://gnomad.broadinstitute.org/gene/ENSG00000131711>). Only variants observed in the canonical transcript included; ENSEMBL: ENST00000296755-ENSP00000296755 [[https://www.ensembl.org/Homo\\_sapiens/Transcript/Summary?db=core;g=ENSG00000131711;r=5:72107234-72209570;t=ENST00000296755](https://www.ensembl.org/Homo_sapiens/Transcript/Summary?db=core;g=ENSG00000131711;r=5:72107234-72209570;t=ENST00000296755)], RefSeq: NM\_005909 [[https://www.ncbi.nlm.nih.gov/nucleotide/NM\\_005909.4](https://www.ncbi.nlm.nih.gov/nucleotide/NM_005909.4)]-NP\_005900 [<https://www.ncbi.nlm.nih.gov/protein/153945728>]

<sup>b</sup>Only variants with a PASS filter in the ExAc or gnomAD databases were included. *MAP1B* LoF variation carrier frequency in both ExAc and gnomAD is estimated to be around 1/10,000.

<sup>c</sup>Heterozygous carriers unless otherwise stated.

**Supplementary Table 5. *MAP1B* copy number variations reported in literature or public databases.**

| Source <sup>a</sup> | Source ID    | Size                   | Inheritance                                  | Phenotype(s)                                                                                                                                                     | Reference |
|---------------------|--------------|------------------------|----------------------------------------------|------------------------------------------------------------------------------------------------------------------------------------------------------------------|-----------|
| DECIPHER            | 257500       | 2.41 Mb triplication   | Unknown                                      | Unknown                                                                                                                                                          | 13        |
| DECIPHER            | 265175       | 3.84 Mb duplication    | De novo constitutive                         | Intellectual disability, Macrocephaly                                                                                                                            | 13        |
| DECIPHER            | 270911       | 7.18 Mb duplication    | Unknown                                      | Autistic behavior, Clinodactyly of the 5th finger, Delayed speech and language development, Global developmental delay, Intellectual disability, Overlapping toe | 13        |
| DECIPHER            | 273739       | 754.04 kb duplication  | Inherited from parent with unknown phenotype | Unknown                                                                                                                                                          | 13        |
| DECIPHER            | 303204       | 208.20 kb deletion     | Paternally inherited, constitutive in father | Abnormality of the face                                                                                                                                          | 13        |
| Liu et al. 2015     | 10–17471     | 966 kb deletion        | Denovo                                       | Intellectual disability, seizures, borderline microcephaly, normal cranial MRI                                                                                   | 14        |
| VarView -NCBI       | nssv1602328  | 74.39 Mb duplication   |                                              | Developmental delay AND/OR other significant developmental or morphological phenotypes                                                                           | 15        |
| VarView -NCBI       | nssv13638981 | 181.18 Mb duplication  |                                              | Abnormal facial shape; Intrauterine growth retardation; Micrognathia; Syndactyly; Ventricular septal defect                                                      | 15        |
| VarView -NCBI       | nssv13655232 | 181.18 Mb duplication  |                                              | Abnormality of the ear; Polydactyly; Short stature; obsolete Malformation of the heart and great vessels                                                         | 15        |
| VarView -NCBI       | nssv13640215 | 181.20 Mb duplication  |                                              | Global developmental delay                                                                                                                                       | 15        |
| VarView -NCBI       | nssv13648398 | 159.52 Mb duplication  |                                              | Camptodactyly; Cleft palate; Dolichocephaly; Feeding difficulties; Microglossia; Pierre-Robin sequence; Respiratory distress                                     | 15        |
| VarView -NCBI       | nssv3396043  | 647.024 kb duplication |                                              | Developmental delay AND/OR other significant developmental or morphological phenotypes                                                                           | 15        |
| VarView -NCBI       | nssv466211   | 62.05 Mb duplication   |                                              |                                                                                                                                                                  | 16        |
| VarView -NCBI       | nssv466212   | 131.11 Mb deletion     |                                              |                                                                                                                                                                  | 16        |
| VarView -NCBI       | essv6984884  | 94.19 Mb duplication   |                                              |                                                                                                                                                                  | 17        |
| VarView -NCBI       | nssv1161363  | 16.97 Mb duplication   |                                              |                                                                                                                                                                  | 18        |
| VarView -NCBI       | nssv1161365  | 1.04 Mb duplication    |                                              |                                                                                                                                                                  | 18        |
| VarView -NCBI       | nssv3459625  | 16.97 Mb duplication   |                                              |                                                                                                                                                                  | 19        |
| VarView -NCBI       | nssv3446828  | 1.04 Mb duplication    |                                              |                                                                                                                                                                  | 19        |

<sup>a</sup>Database or Publication:DECIPHER = DatabasE of genomiC variation and Phenotype in Humans using Ensembl Resources v9.19 (<https://decipher.sanger.ac.uk/>); VarView-NCBI = Variation Viewer-NCBI (<https://www.ncbi.nlm.nih.gov/variation/view/>).

## SUPPLEMENTARY FIGURES

**Supplementary Figure 1. Schematic of *MAP1B* exons and *MAP1B* protein (canonical transcripts).** **a)** Position of LoF variants in exons to scale (introns are not to scale) and **b)** relative to protein domains. All of the LoF variants are located in exon 5 (hg38:chr5:72193866-72200367) of *MAP1B*. No other LoF variants were found in *MAP1B* in the Icelandic sample. The *MAP1B* amino acid positions are in GenBank: NP\_005900[<https://www.ncbi.nlm.nih.gov/protein/153945728>] and c. (coding) positions are in cDNA GenBank: NM\_005909[[https://www.ncbi.nlm.nih.gov/nucore/NM\\_005909.4](https://www.ncbi.nlm.nih.gov/nucore/NM_005909.4)]. E712KfsTer10 (c.2133delG, hg38:chr5:72195488 (G/-)), E1032Ter (c.3094G>T, hg38:chr5:72196449 (G/T)), R1664Ter (c.4990C>T, hg38:chr5:72198345 (C/T)). E – Exons, UTR – Untranslated region, HC – Heavy chain, LC1 – Light chain 1, MTB - microtubule-binding domain, AB - actin-binding domain, MTA - microtubule assembly helping site, putative. See Entrez for *MAP1B*[<https://www.ncbi.nlm.nih.gov/gene/4131>] gene information. The red dotted lines represent the ExAc variants listed in Supplementary Table 4.

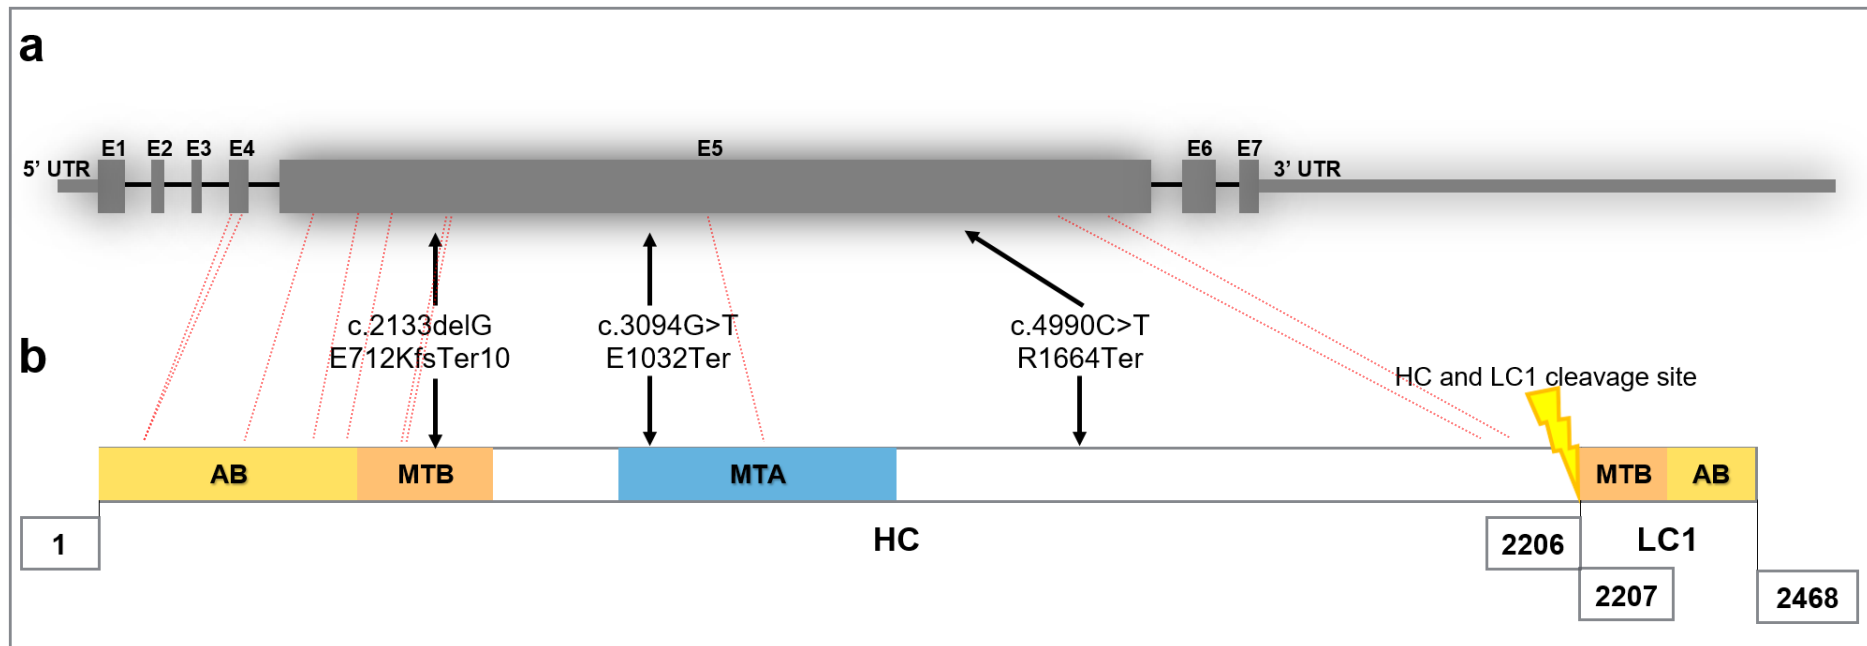

**Supplementary Figure 2. Pedigree plots of *MAP1B* families indicating the most likely carrier of the *de novo* event.** **a)** Family 1 (FAM1). The c.2133delG variant (E712KfsTer10) was transmitted from the great-grandmother (FAM1-A1) to the grandmother (FAM1-B1), and into two of her children (FAM1-C2 and FAM1-C1). Then from FAM1-C1 to the index cases (FAM1-D1-D2-D3) and one of their offspring (FAM1-E1). Parent-of-origin data indicate that FAM1-A1 inherited the chromosome carrying the variation from her father. Sanger sequencing three FAM1-A1's siblings' descendants (X1, X2, and X3), who shared the paternal haplotype harboring the variant, found that none carried the c.2133delG variant. Therefore, a *de novo* mutation most likely occurred during gametogenesis in FAM1-A1's father. **b)** Family 2 (FAM2). The siblings (FAM2-J1-J2-J3) inherited the c.3094G>T variant (E1032Ter) from their mother (FAM2-H1) and parent-of-origin data indicated that it was transmitted from her father (FAM2-G1) who in turn inherited the chromosome carrying the variation from his mother. We were unable to sequence either FAM2-G1 or his mother. However, we sequenced two of FAM2-G1's siblings (X4, X5) who shared the haplotype harboring the variant, but neither of them carried the c.3094G>T variant. Therefore, the mutation most likely occurred during gametogenesis in FAM2-G1 since it is unlikely to have occurred in his mother as out of her three children, all share the same haplotype from her, only FAM2-G1 has the variation. **c)** Family 3 (FAM3). According to parent-of-origin data, FAM3-L1 and her sibling (FAM3-L2) carried the same haplotypes from their parents at the *MAP1B* locus. However, Sanger sequencing revealed that neither the sibling nor either parent carried the c.4990C>T variant (R1664Ter). Hence, the *de novo* mutation originated in one of the parents (FAM3-K1 or FAM3-K2).

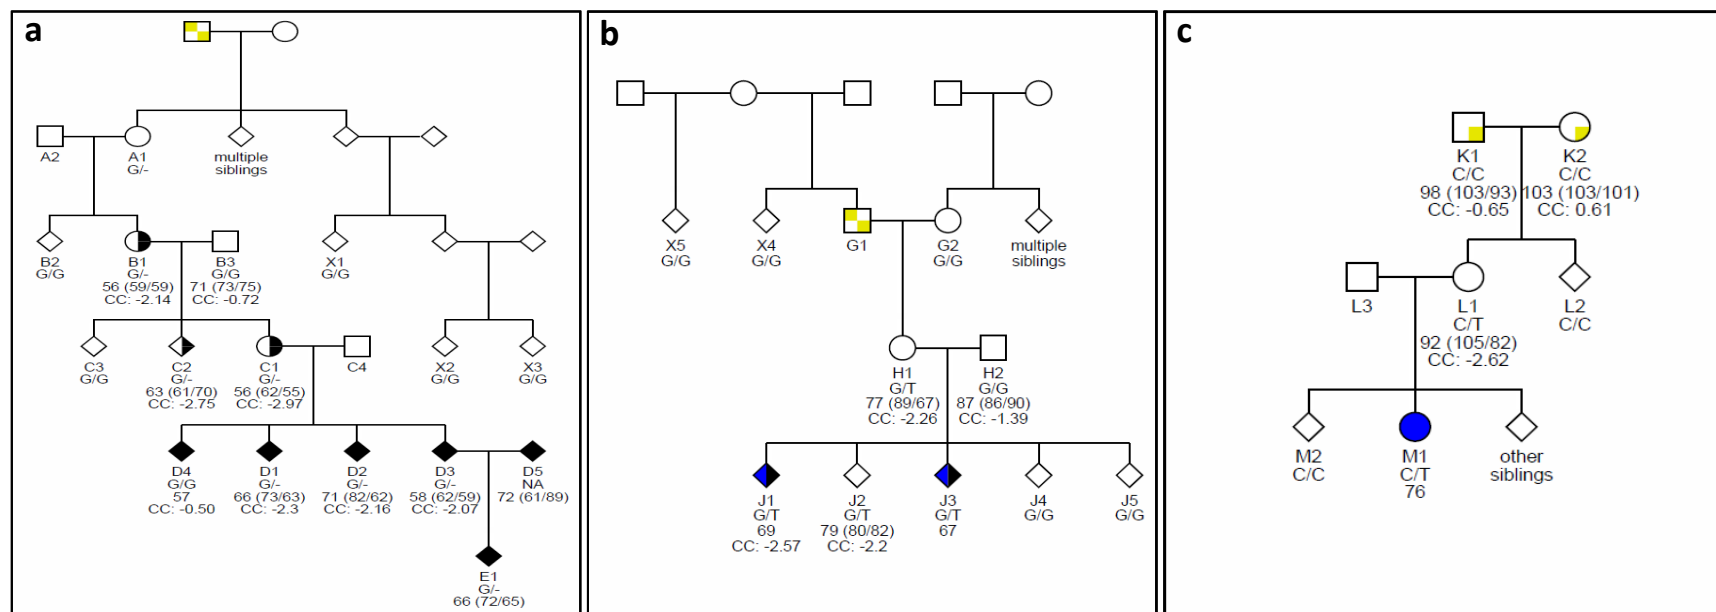



**Footnote for Supplementary Figure 2.** Squares are male, circles are female, diamonds are where gender is withheld, unfilled are unaffected, filled with black are intellectual disability affected, half black and white are individuals without a clinical diagnosis but an IQ below 70, blue are Autism spectrum disorder affected and yellow and white squares within the pedigree symbol indicates where it is most likely the initial *MAP1B* LoF mutation event occurred. Below each icon is the subjects: alias; *MAP1B* LoF variant genotype; Full Scale IQ (Verbal IQ / Performance IQ) from WASI<sup>IS</sup> or WPPSI-R (FAM1-B1,-B3,-C1,-C2,-D1,-D2,-D3; FAM2-H1,-H2,-J2; FAM3-K1,-K2,-L1 or FAM1-D5,-E1, respectively), or only Full Scale IQ reported from WISC-IV (FAM1-D4, FAM2-J1,-J3 and FAM3-M1), and Corpus callosum (CC) volume (all individuals with structural MRI also have DTI except FAM1-C1).

**Supplementary Figure 3. Plot of mean IQ and cognitive assessment scores in *MAP1B* LoF carriers compared with controls. a)** IQ (WASI<sup>IS</sup>, WISC-IV or WPPSI-R) and WASI<sup>IS</sup> subtests, **b)** cognitive test battery scores. *MAP1B* LoF carriers (n = 13 for FSIQ and n = 9 for subtests; FAM1-B1,-C1,-C2,-D1,-D2,-D3,-E1, FAM2-H1,-J1,-J2,-J3, FAM3-L1,-M1) and controls (n = 2226 for IQ and n = 1768 for subtests; see Tables 1 and 2 for the number of cognitively assessed individuals in each group). IQ and cognitive test scores were inverse normal transformed. Cognitive test scores were also adjusted for sex, age and age<sup>2</sup>. Note, adjustment for relatedness is not applied, as in Tables 1 and 2. IQ and cognitive test scores were then shifted and scaled so that controls had a mean of 0 and a standard deviation of one. While the lower IQ scores represent greater impairment, the cognitive test scores were arranged such that higher scores indicate greater impairment, in *MAP1B* LoF carriers. Bars either side of mean values represent 95% confidence interval (95 % CI). Dotted grey line in **(b)** is the average score (0.92 SD), in the *MAP1B* LoF carriers, for all cognitive tasks (excluding GAF).

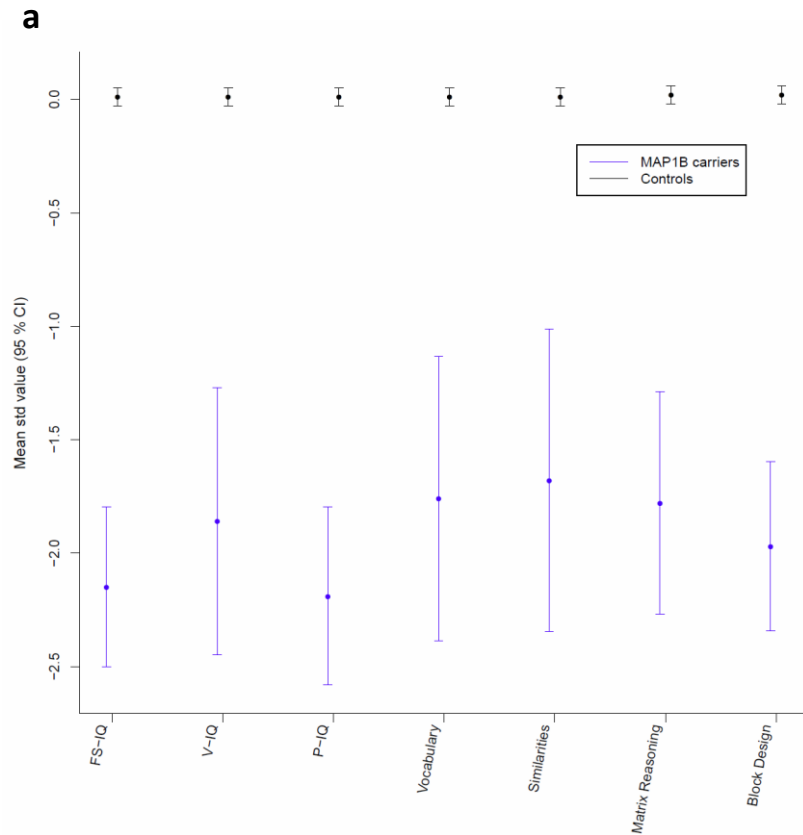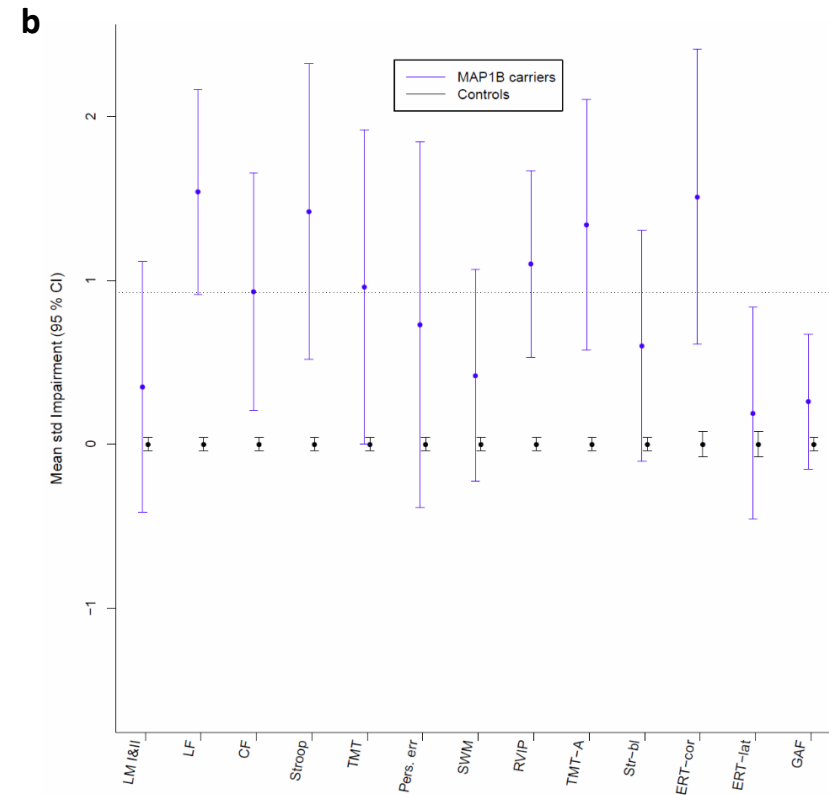

**Footnote for Supplementary Figure 3.** LMI&II - logical memory subtest from the Wechsler Memory Scale III (WMS-III), LF - Letter Fluency from the controlled oral word association test (COWAT), CF - Category Fluency from the category naming test, Stroop - name color minus color pad task, TMT - Trail-Making Test (refers to part B minus part A), Pers. err. - Perseverative error from the Wisconsin card-sorting test (WCST), SWM - Spatial Working Memory, RVIP - Rapid Visual Information Processing, TMT-A - Trail-Making Test part A, Str-bl - Stroop black letter, ERT-Cor and - Lat – Emotion Recognition Task percentage correct and mean response latency, GAF – Global Assessment of Functioning.

**Supplementary Figure 4. Plot of IQ versus polygenic score for IQ (PGS-IQ) in *MAP1B* carriers compared with controls.** The IQ score and PGS-IQ was available for 13 *MAP1B* carriers, 4 noncarrier relatives, and 2,164 control subjects. The dotted lines are the mean IQ (102.3, SD 14.7; horizontal) and mean PGS-IQ (0.03, SD 1; vertical) in the control subjects; the mean values for the *MAP1B* carriers are 68.9 (SD 10.3) and -0.2 (SD 0.6), respectively.

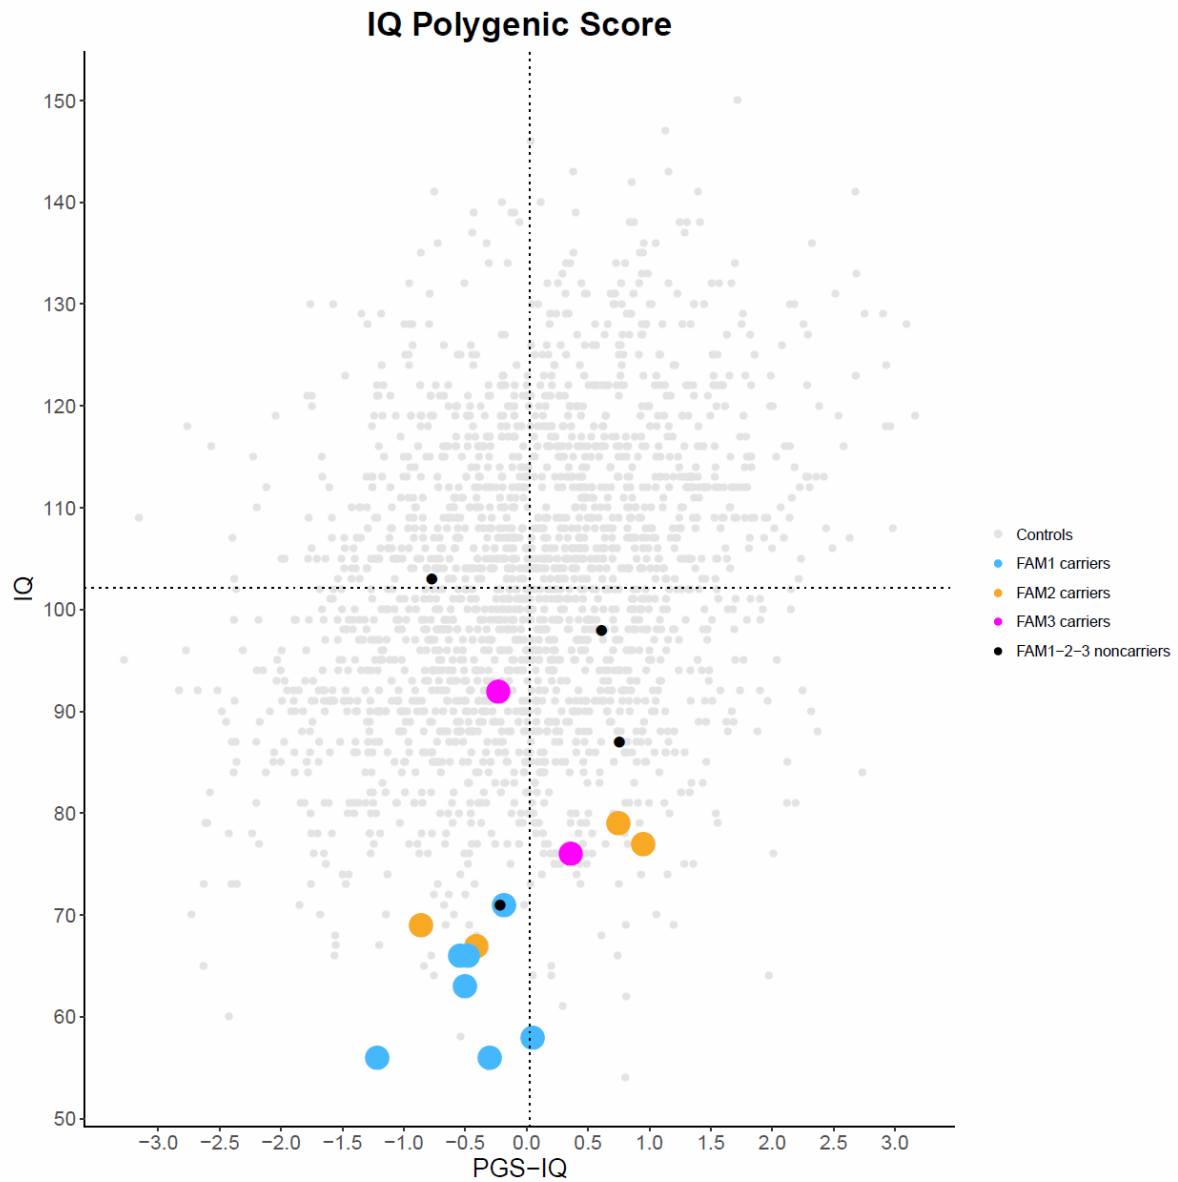

**Supplementary Figure 5. Plot of IQ versus polygenic score for Educational Attainment (PGS-EDU) in *MAP1B* carriers compared with controls.** The IQ score and PGS-EDU was available for 13 *MAP1B* carriers, 4 noncarrier relatives, and 2,164 control subjects. The dotted lines are the mean IQ (102.3, SD 14.7; horizontal) and mean PGS-EDU (0.03, SD 1; vertical) in the control subjects; the mean values for the *MAP1B* carriers are 68.9 (SD 10.3) and 0.09 (SD 0.93), respectively.

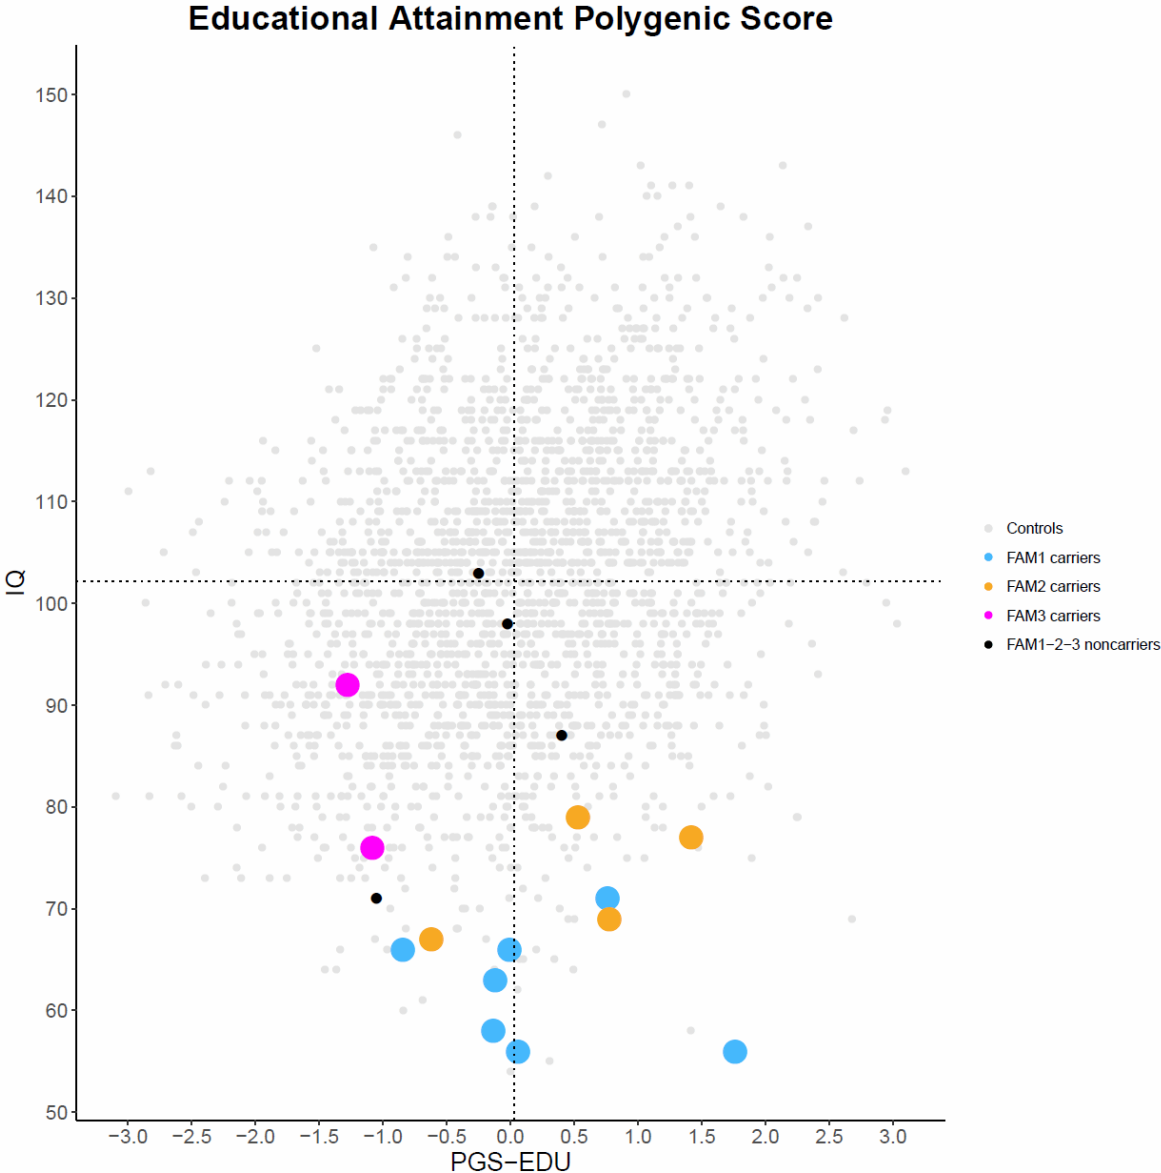

**Supplementary Figure 6. a) Corpus callosum and b) brain-wide white matter volume box and whisker plots for controls (n = 856), *MAP1B* LoF carriers (n = 10; FAM1-B1,-C1,-C2,-D1,-D2,-D3, FAM2-H1,-J1,-J2, FAM3-L1), their noncarrier relatives (n = 5; FAM1-B3,-D4, FAM2-H2, FAM3-K1,-K2), noncarrier controls with low CC ( $\beta < -1.5$  SD; n = 53) or low WM ( $\beta < -1.5$  SD; n = 52) volume.**

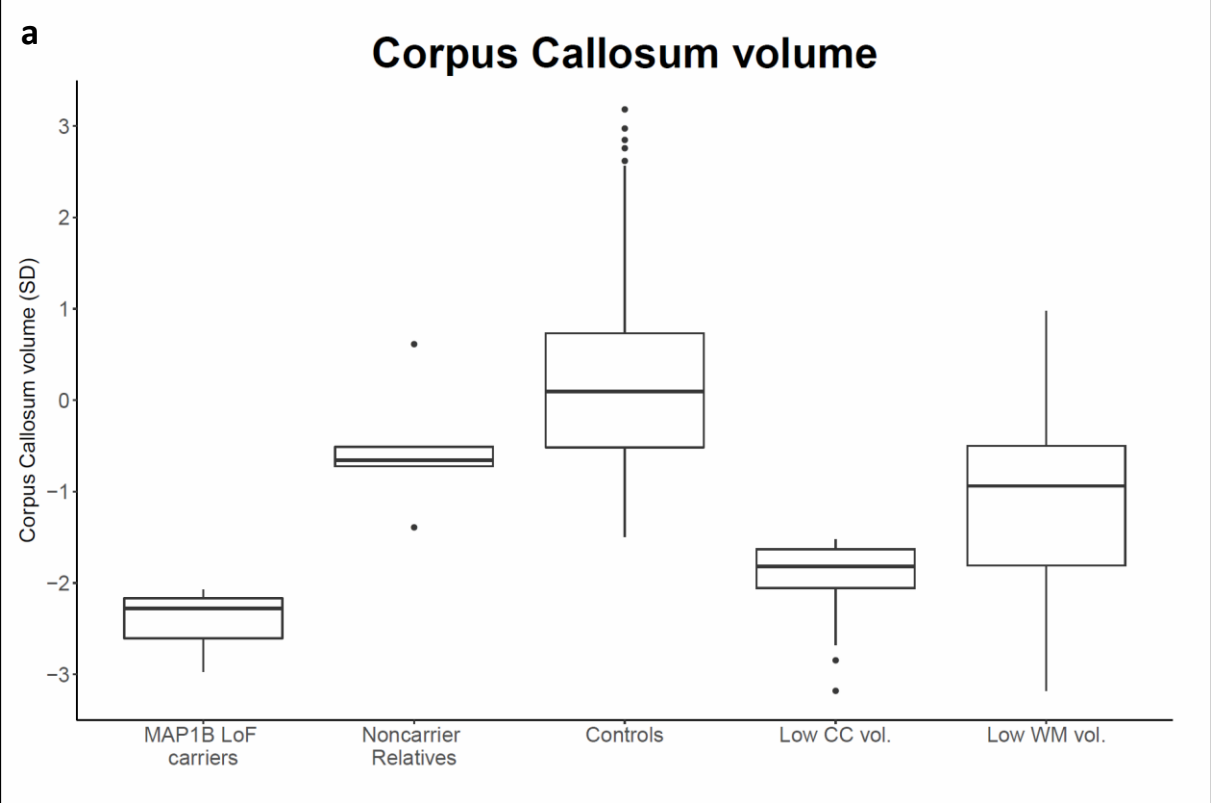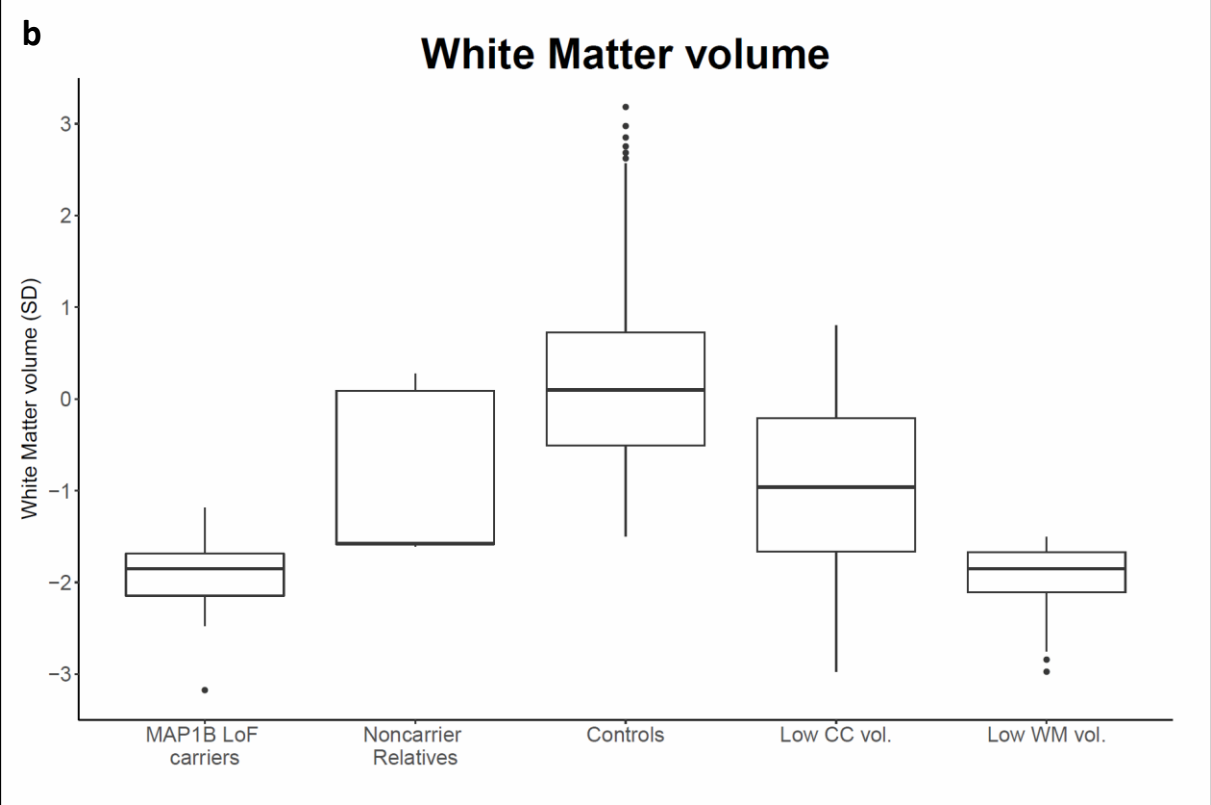

**Supplementary Figure 7. Greyscale images of MAP1B antibody binding on a western blot.** Western blot using the Odyssey imaging system. The greyscale images show the infrared fluorescent signals from the 700 nm channel (V5 antibody signal) and the 800 nm channel (MAP1B antibody signal) taken from the same blot. The western bands represent protein isolate from HeLa cells transfected with plasmids producing the (i) wild-type MAP1B light chain 1 (LC1), (ii) E712KfsTer10, (iii) E1032Ter and (iv) R1664Ter proteins; (v) is untransfected plasmid and (vi) is the wild-type MAP1B heavy chain (HC). For a merged image, see Figure 4.

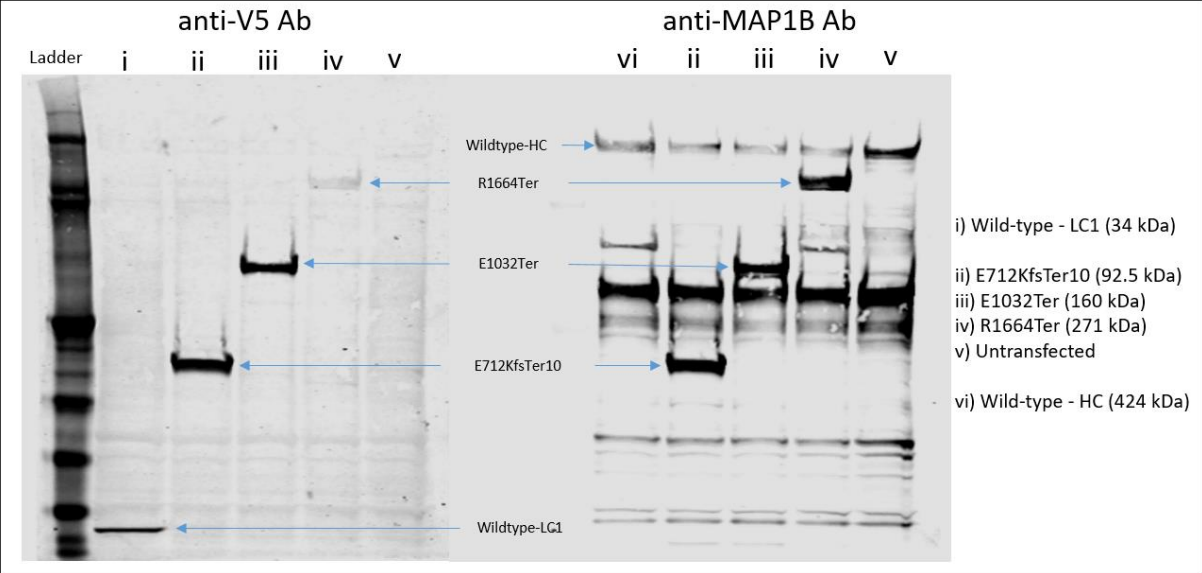

## SUPPLEMENTARY REFERENCES

1. Gudmundsson E. Mat á greind fullorðinna: WASIIS (Menntamalastofnun, Reykjavik, Iceland) [The Assessment of Intelligence in Adults: WASIIS]. (2015).
2. Wechsler D. Wechsler Abbreviated Scale of Intelligence. (1999).
3. Wechsler D. *Wechsler Preschool and Primary Scale of Intelligence – Revised*. The Psychological Corporation (1989).
4. Wechsler D. *The Wechsler Intelligence Scale for Children-III*, third edition edn. The Psychological Corporation (1991).
5. Wechsler D. *The Wechsler intelligence scale for children-IV*, fourth edition edn. Pearson (2004).
6. Tripi G, Roux S, Canziani T, Bonnet Brilhault F, Barthelemy C, Canziani F. Minor physical anomalies in children with autism spectrum disorder. *Early Hum Dev* **84**, 217-223 (2008).
7. Iossifov I, *et al.* De novo gene disruptions in children on the autistic spectrum. *Neuron* **74**, 285-299 (2012).
8. Iossifov I, *et al.* The contribution of de novo coding mutations to autism spectrum disorder. *Nature* **515**, 216-221 (2014).
9. De Rubeis S, *et al.* Synaptic, transcriptional and chromatin genes disrupted in autism. *Nature* **515**, 209-215 (2014).
10. Krumm N, *et al.* Excess of rare, inherited truncating mutations in autism. *Nat Genet* **47**, 582-588 (2015).
11. Deciphering Developmental Disorders S. Prevalence and architecture of de novo mutations in developmental disorders. *Nature* **542**, 433-438 (2017).
12. Kosmicki JA, *et al.* Refining the role of de novo protein-truncating variants in neurodevelopmental disorders by using population reference samples. *Nat Genet*, (2017).
13. Firth HV, *et al.* DECIPHER: Database of Chromosomal Imbalance and Phenotype in Humans Using Ensembl Resources. *Am J Hum Genet* **84**, 524-533 (2009).
14. Liu YF, *et al.* Autism and Intellectual Disability-Associated KIRREL3 Interacts with Neuronal Proteins MAP1B and MYO16 with Potential Roles in Neurodevelopment. *PLoS One* **10**, e0123106 (2015).
15. Miller DT, *et al.* Consensus statement: chromosomal microarray is a first-tier clinical diagnostic test for individuals with developmental disabilities or congenital anomalies. *Am J Hum Genet* **86**, 749-764 (2010).



16. Korbelt JO, *et al.* Paired-end mapping reveals extensive structural variation in the human genome. *Science* **318**, 420-426 (2007).
17. Pinto D, Marshall C, Feuk L, Scherer SW. Copy-number variation in control population cohorts. *Hum Mol Genet* **16 Spec No. 2**, R168-173 (2007).
18. Cooper GM, *et al.* A copy number variation morbidity map of developmental delay. *Nat Genet* **43**, 838-846 (2011).
19. Coe BP, *et al.* Refining analyses of copy number variation identifies specific genes associated with developmental delay. *Nat Genet* **46**, 1063-1071 (2014).
